# Supplementary material
Source: publisher site journal article supplement (https://www.spandidos-publications.com/7691/downloadSupplementary)
Supplement: Supplementary file 1 [file downloadSupplementary]

## Sheet: Sheet1
Table SI. Information of the antibody arrays used in the references
Ref	Array map (catalog)	Target number	Sample type	Species
[8]	AAH-CYT-4000	274	Conditioned medium	Human
[9]	AAH-INF-1	20	Conditioned medium	Human
[11]	Customized	448	Conditioned medium	Human
[29]	AAH-CYT-5	80	Conditioned medium	Human
[40]	AAH-CHE-1	38	Cell lysates	Human
[71]	QAH-CYT-9/AAH-CYT-G9	40/51	Conditioned medium	Human
[72]	QAH-CYT-9/AAH-CYT-G9	40/51	Conditioned medium	Human
[73]	AAH-ADI-1	62	Conditioned medium	Human
[74]	Undefined		Conditioned medium	Human
[75]	AAH-BLG-1000	1000	Conditioned medium	Human
[76]	AAH-CYT-5	80	Conditioned medium	Human
[77]	Undefined		Conditioned medium	Mouse
[78]	AAH-CYT-5	80	Conditioned medium	Human
[79]	AAH-CYT-5	80	Conditioned medium	Human
[80]	Undefined		Conditioned medium	Mouse
[81]	AAH-CYT-5	80	Conditioned medium	Human
[82]	AAH-CYT-5	80	Conditioned medium	Human
[83]	AAH-CYT-5	80	Conditioned medium	Human
[84]	AAH-CYT-5	80	Cell lysates	Human
[85]	AAH-BLG-1000	1000	Tissue lysates	Human
[86]	AAM-BLG-1	308	Cell lysates	Mouse
[87]	AAM-CYT-1000	96	Conditioned medium	Mouse
[88]	AAH-CHE-1	38	Conditioned medium	Human
[89]	AAH-CYT-5	80	Conditioned medium	Human
[90]	AAH-CYT-1000 + AAH-ANG-1	120 + 36	Conditioned medium	Human
[91]	AAH-CYT-6	60	Conditioned medium	Human
[92]	Customized	11	Conditioned medium	Human
[93]	Undefined		Conditioned medium	Human
[94]	AAM-BLG-1	308	Conditioned medium	Mouse
[95]	AAM-CYT-2000	144	Conditioned medium	Mouse
[96]	AAH-CYT-5	80	Conditioned medium	Human
[97]	AAH-CYT-5	80	Conditioned medium	Human
[98]	AAH-INF-1	20	Conditioned medium	Human
[99]	AAH-CYT-G5	80	Conditioned medium	Human
[100]	AAH-CYT-4000	274	Conditioned medium	Human
[101]	AAH-GF-1	41	Cell lysates	Human
[102]	QAH-INF-3	40	Conditioned medium	Human
[103]	AAH-CYT-5	80	Conditioned medium	Human
[104]	AAH-BLM-1 + ab133997	507 + 42	Conditioned medium	Human
[105]	AAH-CYT-5	80	Conditioned medium	Human
[106]	AAH-GF-1	41	Conditioned medium	Human
[107]	Undefined		Conditioned medium	Rat
[108]	AAM-CYT-1000	96	Conditioned medium	Mouse
The array information was collected from the references by comparing the methods and results of the researches and information from the manufactures website.
